# Supplementary material for: NFIA differentially controls adipogenic and myogenic gene program through distinct pathways to ensure brown and beige adipocyte differentiation
Source: PLoS Genet. 2020 Sep 29;16(9):e1009044. doi: 10.1371/journal.pgen.1009044 (PMC7546476; doi:10.1371/journal.pgen.1009044)
Supplement: S1 Table — (XLSX) [file pgen.1009044.s012.xlsx]

## Sheet: primers used for qPCR analysis
S1 Table
Primers used for qPCR analysis
1) Primers used for RT-qPCR analysis of murine samples
Gene	Fwd primer (5’-3’)	Rev primer (5’-3’)
Nfia	GTATTCTCCGCTCTGTCTCACC	TTTTGAAGTATTTCCGCTTTCG
Nfia_all variants	GGCCCCAATTTTTCTCTCTC	TGTCCATTTCATCCTCCACA
Nfia_uc008ttt.2	AGCCAGGTGAGCAGAGTCAT	TGCTGGTGACAGCCTATGAG
Nfia_uc008tts.2, uc008ttu.2, uc008tty.2	TGTGGAGGATGAAATGGACA	GGCTGCTGAAACCAGACTTC
Nfia_uc008ttx.1	CCTTTTTGGTTTGAGGGACA	AACTGGCCACATGGAAAAAC
Myod1	AGCACTACAGTGGCGACTCA	GGCCGCTGTAATCCATCAT
Myog	AGCGCAGGCTCAAGAAAGTGAATG	CTGTAGGCGCTCAATGTACTGGAT
Myl9	ACAGCGCCGAGGACTTTTC	AGACATTGGACGTAGCCCTCT
Pparg	CCATTCTGGCCCACCAAC	AATGCGAGTGGTCTTCCATCA
Pparg1	CTGCGTAACTGACAGCCTAAC	ACTTGGTCACTCTCCGTCCT
Pparg2	CTGGGAGATTCTCCTGTTGACC	CCTTGCAGCAACATCAGGAA
Fabp4	CACCGCAGACGACAGGAAG	GCACCTGCACCAGGGC
Ppargc1a	GAAAGGGCCAAACAGAGAGA	GTAAATCACACGGCGCTCTT
Ucp1	GGCCTCTACGACTCAGTCCA	TAAGCCGGCTGAGATCTTGT
Rplp0	GATGCCCAGGGAAGACAG	ACAATGAAGCATTTTGGATAATCA
2) Primers used for ChIP-qPCR and FAIRE-qPCR analysis of murine samples
Locus	Fwd primer (5’-3’)	Rev primer (5’-3’)
Ins1 -0.4kb	CTTCAGCCCAGTTGACCAAT	AGGGAGGAGGAAAGCAGAAC
Pparg2 21kb	TGGCAGCCAAGGTCTTATACA	CTTGCTGTCCCTCTGTCTCC
Pparg2 41kb	ATTCCTCTTCCTCTGTAGCCATC	GTTCAGCTGGTCGATATCACTG
Pparg2 55kb	ACTGCATCCAGCAAGGAGAT	CTCCGGGGCTTTTCTTTACT
Pparg2 58kb	ACTGAAAGTGGAACTGCTGAGTC	GCTCTGAAAAGCCACATCTCTTA
Pparg2 71kb	TTACAAGGCTCTCAAACAAGAGG	AACAGAGCTTGAAAATGTGGAAA
Pparg2 77kb	CTTAGAGAAGGGCGTTGTGC	CAGCTTTTCCAAGGCATGTT
Myod1 -26kb	GCTTATCACCGACCTTTGCA	GGAGAGCAGAGGAGACCAAG
Ppargc1a -97kb	GGCTCAGCGCTAAACAAAGA	GCATCTGCTGTCACCTGAA
Ppargc1a -42kb	GAGACTCCGCTCACATGCTT	CCATGCACGCGGGTATTGTA
Ucp1 9.5kb	TGAGAGGAGTGGGAGTGAGG	CGTAGGCAATGTCCCAAACT
Ucp1 -11.7kb	ACCGTGTAGCTTCCTCTCAG	TTGTCTGACTGAGTCCTGGC
Ucp1 -4.5kb	TCCCAGTGTCACCTTAATTTCTC	AAAGGACTTGGTAAAAGGTGAGG
